# Supplementary material for: Small change for big improvement in the preparation of the key intermediate N1, N3-disubstituted 1,3,5-triazone of ensitrelvir
Source: Royal Society of Chemistry journal article supplement (doi:10.1039/d2ra07844a), 2023-01-01

## Electronic Supplementary Information

for

### Small change for big improvement in the preparation of the key intermediate

#### *N*<sup>1</sup>, *N*<sup>3</sup>-disubstituted 1,3,5-triazone of ensitrelvir

Wei Hu,<sup>#a</sup> Yuanchang Liu,<sup>#a</sup> Xiang Zhang,<sup>a</sup> Panpan Zheng,<sup>a</sup> Feifei Yang,<sup>a</sup>

Guangyang Guo,<sup>a</sup> Xin Xie,<sup>ab</sup> Jiuzhong Huang,<sup>\*ab</sup> Weiming Chen<sup>\*ab</sup>

<sup>a</sup> School of Pharmaceutical Sciences; <sup>b</sup> Key Laboratory of Prevention and Treatment of Cardiovascular and Cerebrovascular Disease, Ministry of Education, Gannan Medical University, Ganzhou 341000, Jiangxi, P. R. China.

#### SPECTROSCOPIC DATA

|                                                                         |           |
|-------------------------------------------------------------------------|-----------|
| <sup>1</sup> H NMR and <sup>13</sup> C NMR of compound <b>10</b> .....  | <b>S2</b> |
| <sup>1</sup> H NMR and <sup>13</sup> C NMR of compound <b>13a</b> ..... | <b>S3</b> |
| <sup>1</sup> H NMR and <sup>13</sup> C NMR of compound <b>13</b> .....  | <b>S4</b> |
| <sup>1</sup> H NMR and <sup>13</sup> C NMR of compound <b>12</b> .....  | <b>S5</b> |
| <sup>1</sup> H NMR and <sup>13</sup> C NMR of compound <b>2</b> .....   | <b>S6</b> |
| HRMS of compound <b>13</b> and <b>12</b> .....                          | <b>S7</b> |

**<sup>1</sup>H NMR (600 MHz) and <sup>13</sup>C NMR (150 MHz) in DMSO-*d*<sub>6</sub> of compound 10**

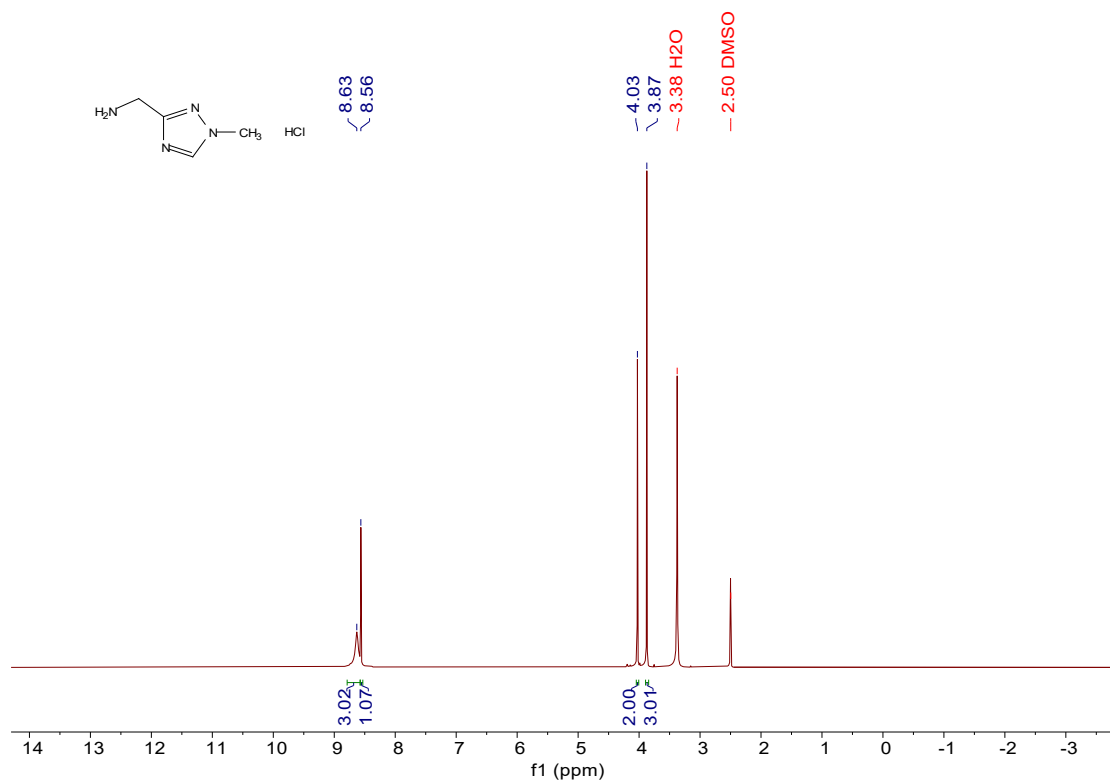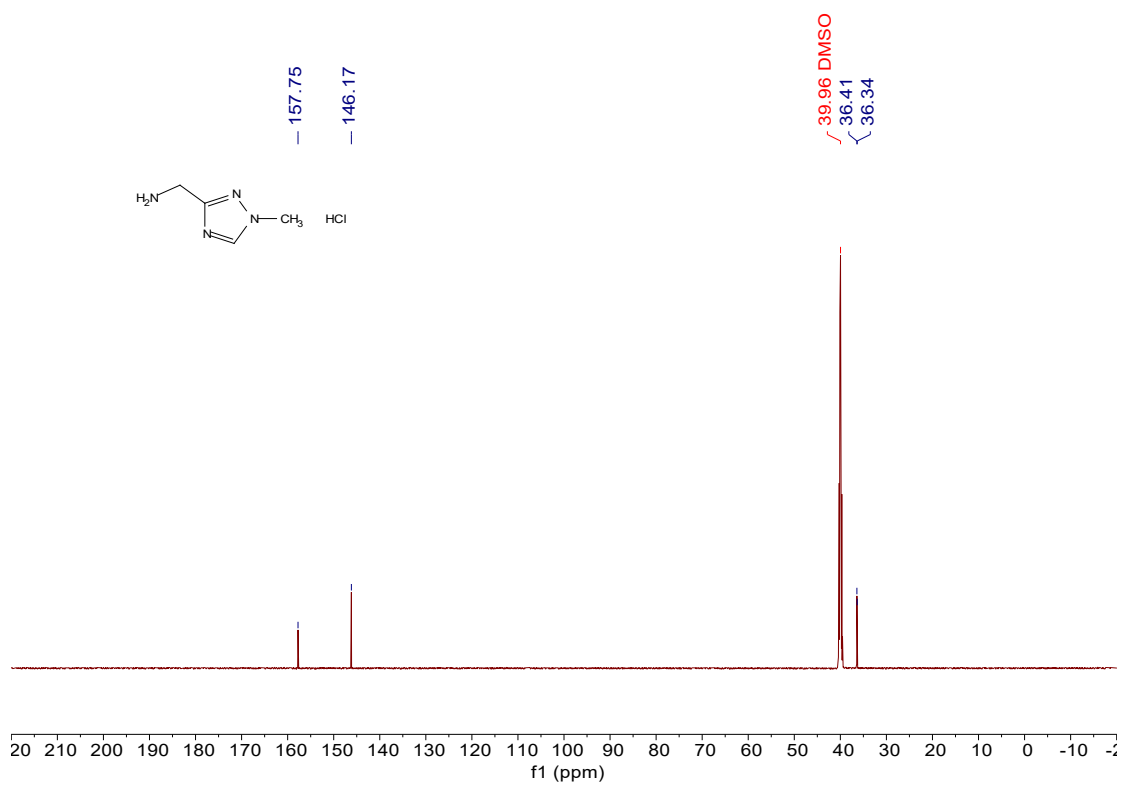

$^1\text{H}$  NMR (400 MHz) and  $^{13}\text{C}$  NMR (100 MHz) in  $\text{CDCl}_3$  of compound **13a**

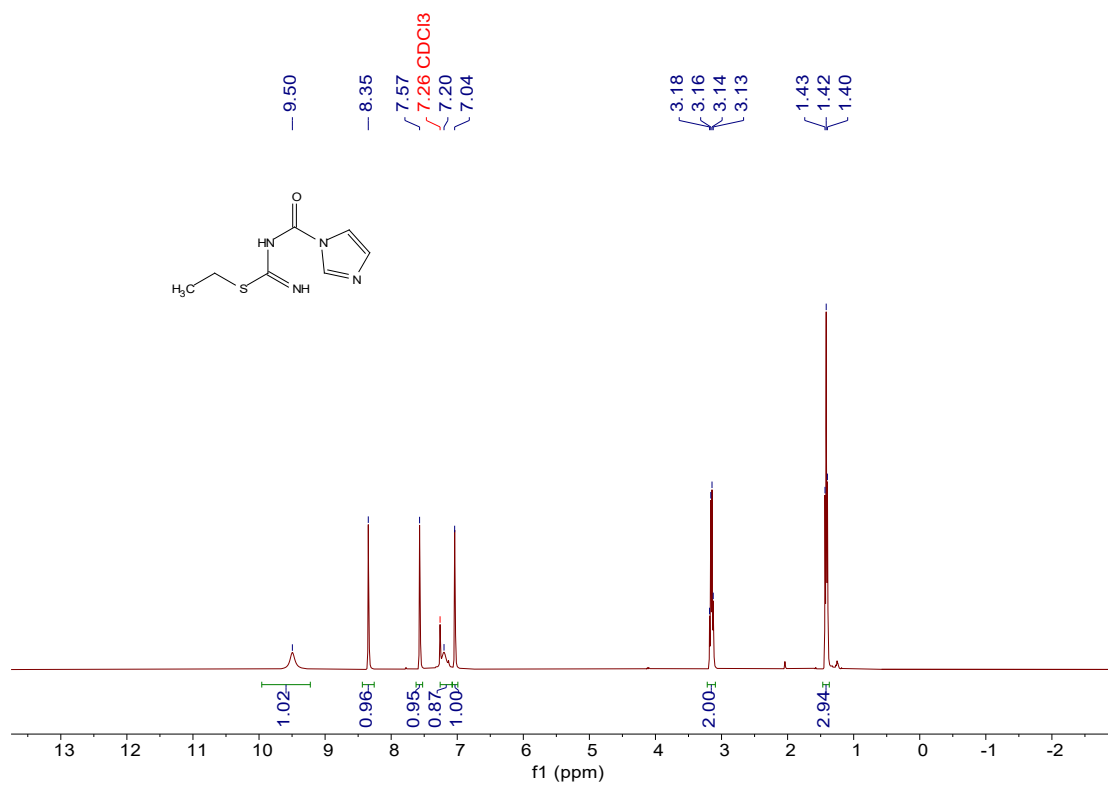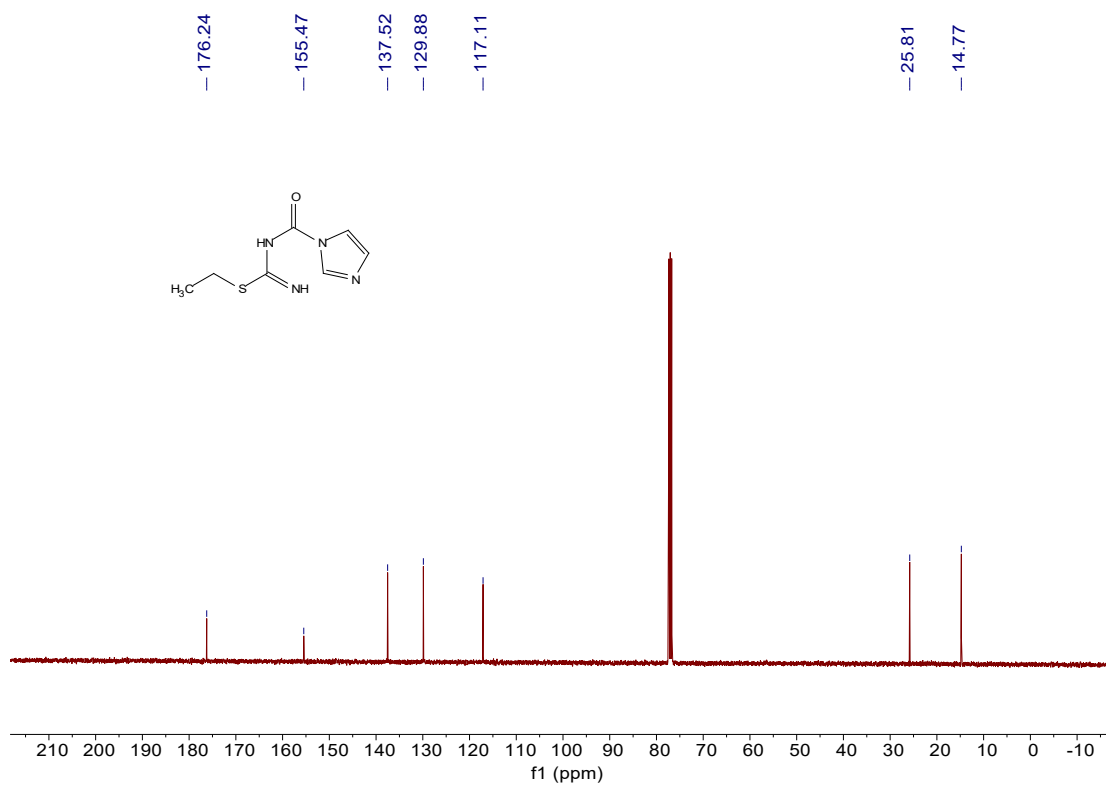

$^1\text{H}$  NMR (600 MHz) and  $^{13}\text{C}$  NMR (150 MHz) in  $\text{CDCl}_3$  of compound **13**

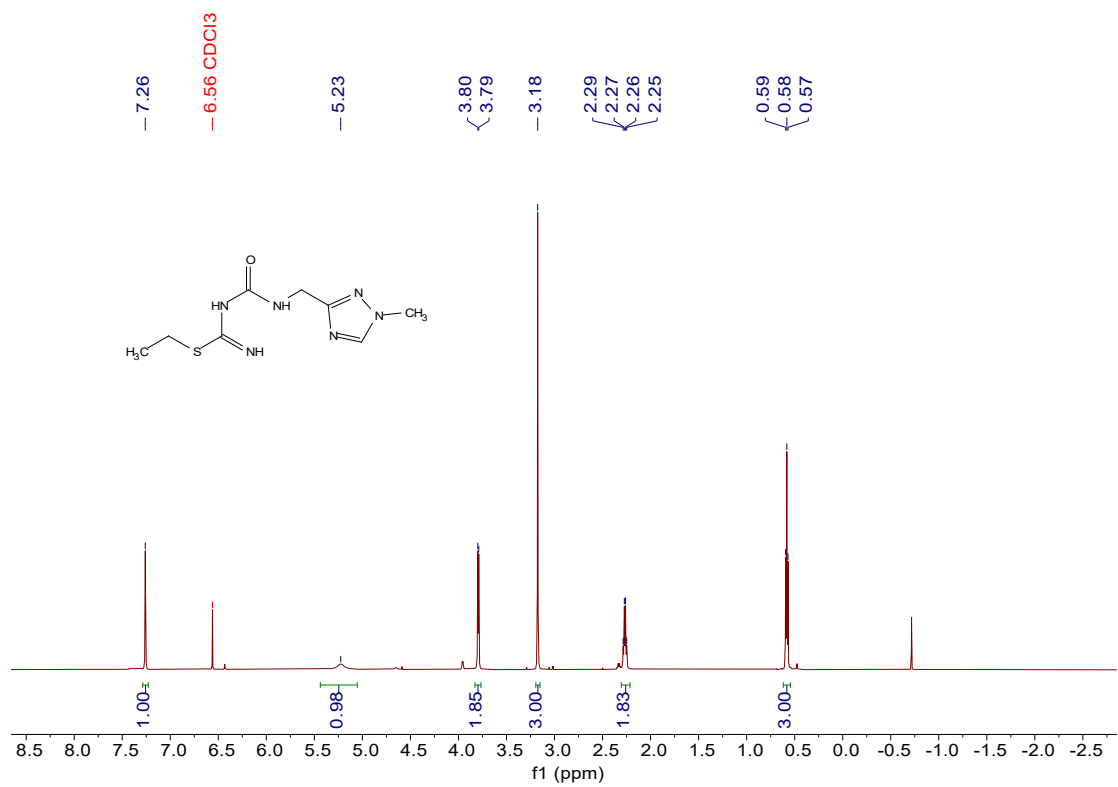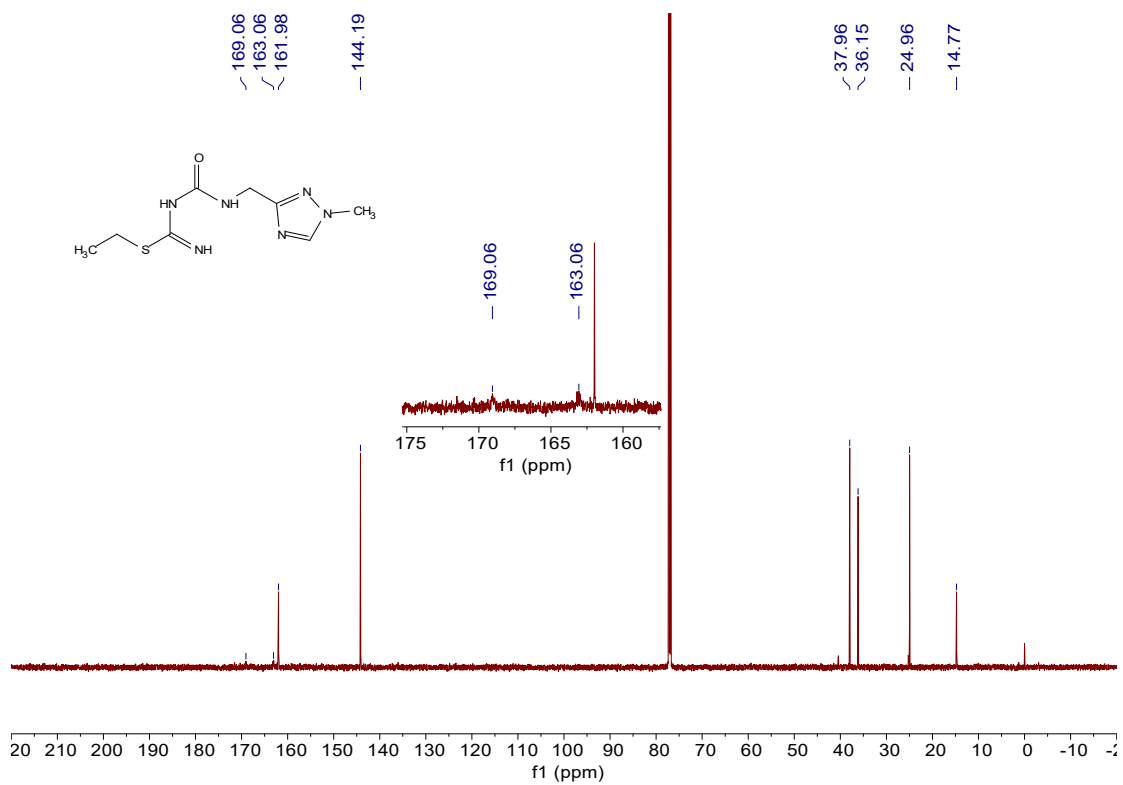

$^1\text{H}$  NMR (400 MHz) and  $^{13}\text{C}$  NMR (100 MHz) in  $\text{DMSO-}d_6$  of compound **12**

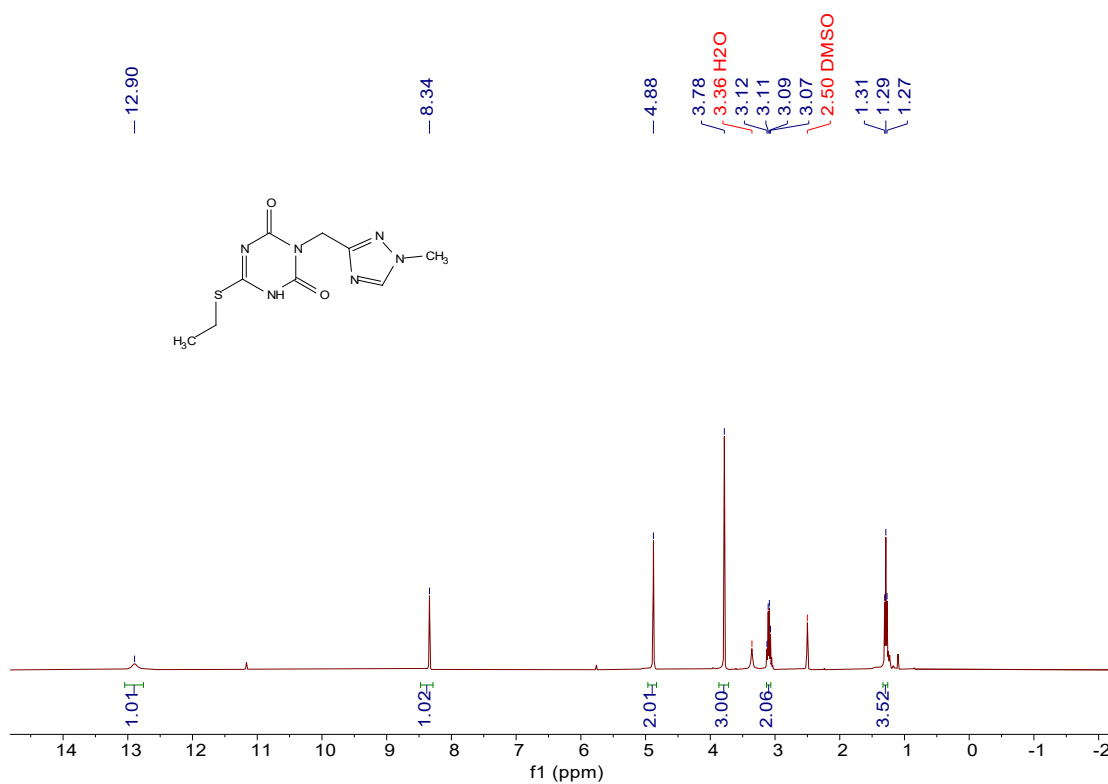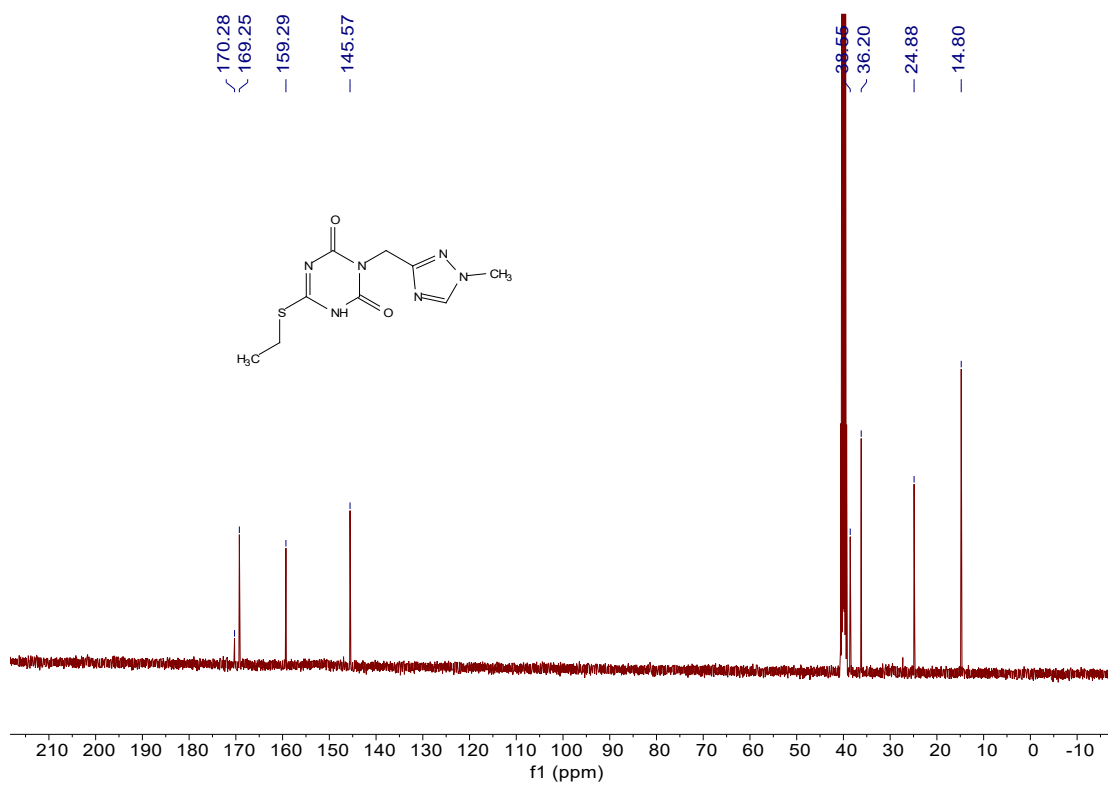

$^1\text{H}$  NMR (400 MHz) and  $^{13}\text{C}$  NMR (100 MHz) in  $\text{CDCl}_3$  of compound **2**

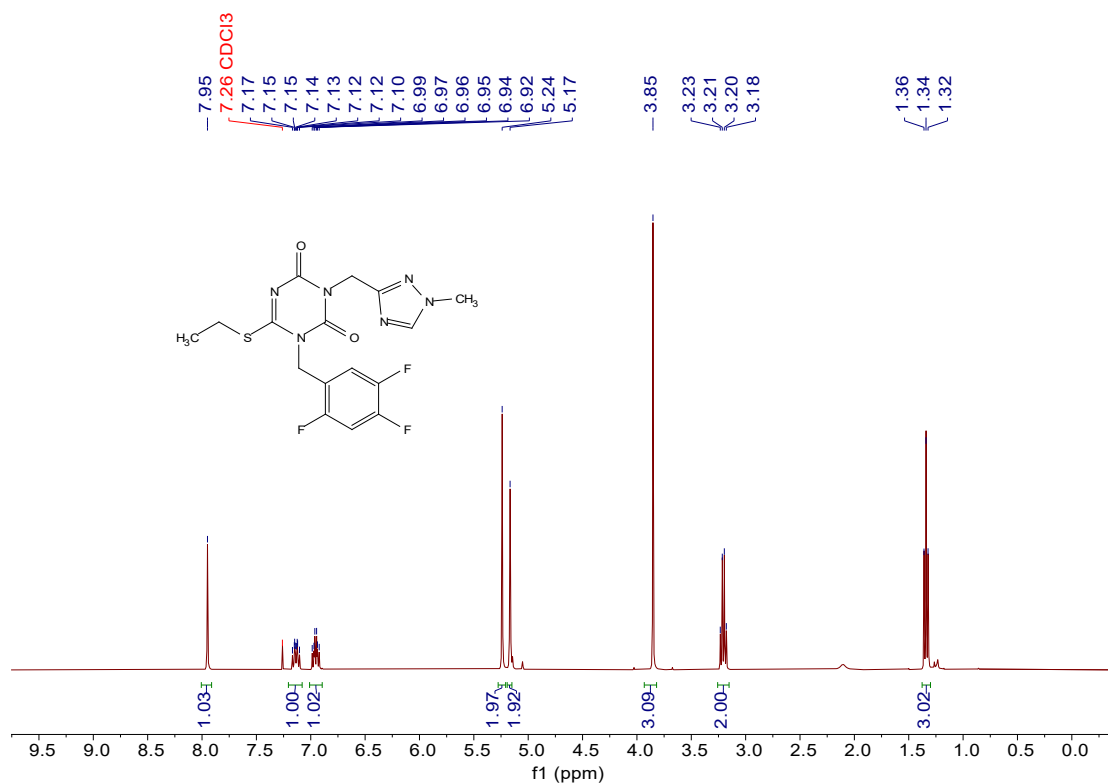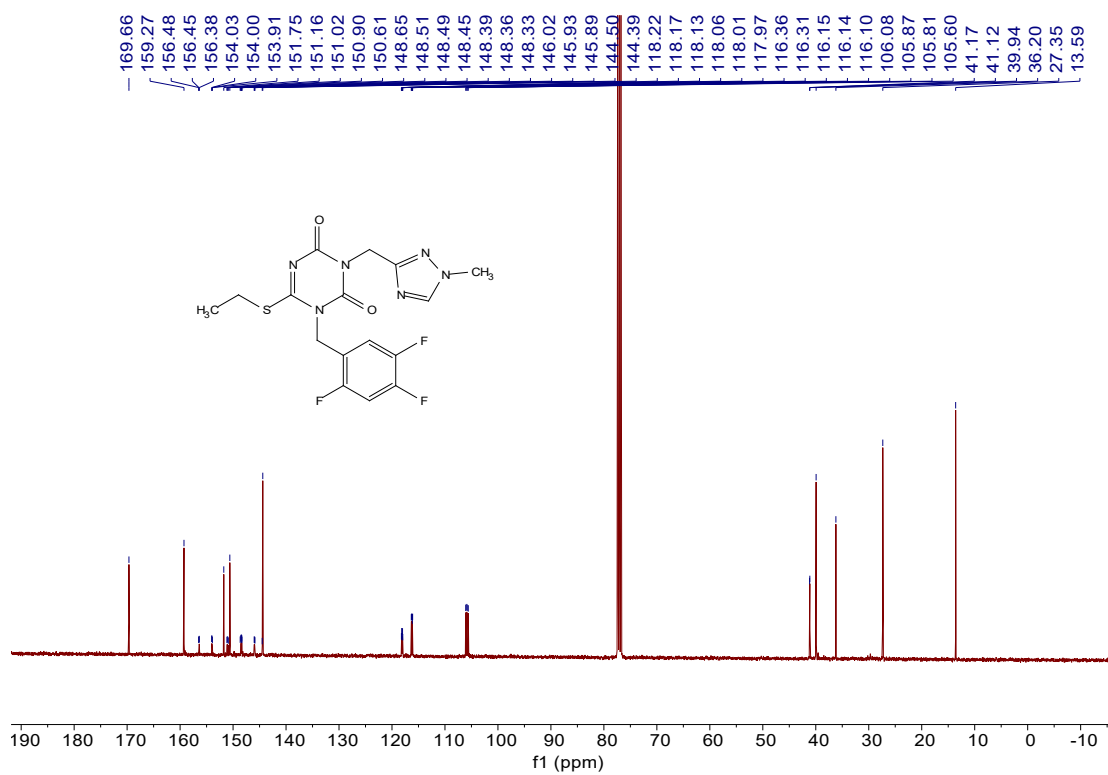

## HRMS of compound 13

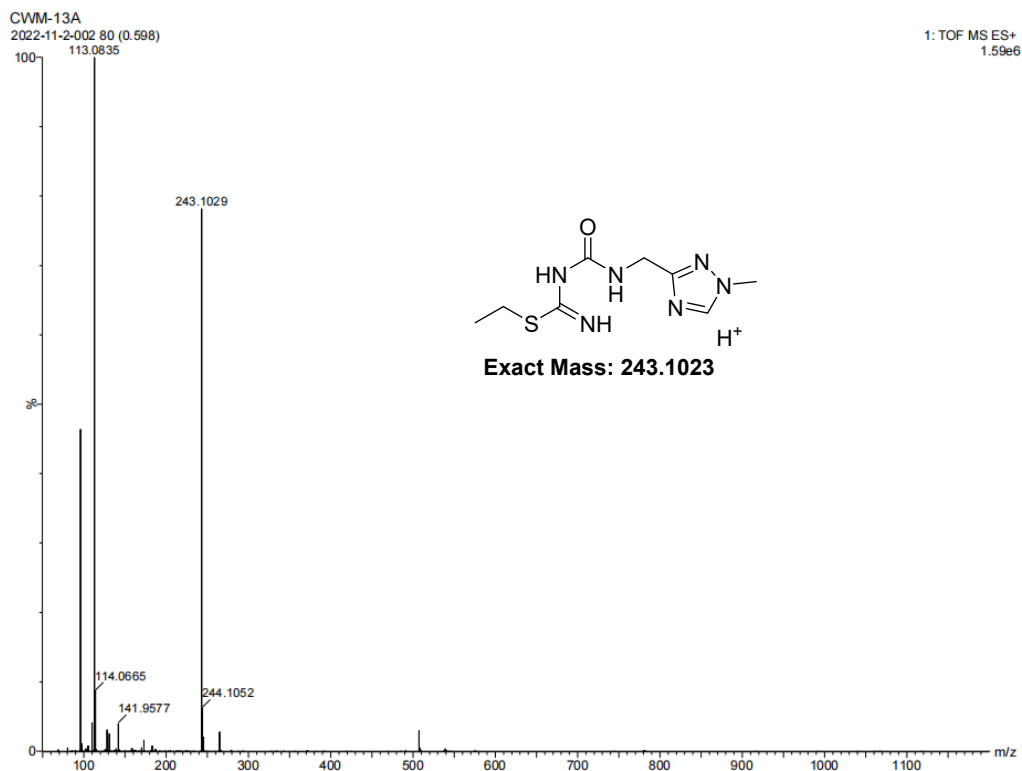

## HRMS of compound 12

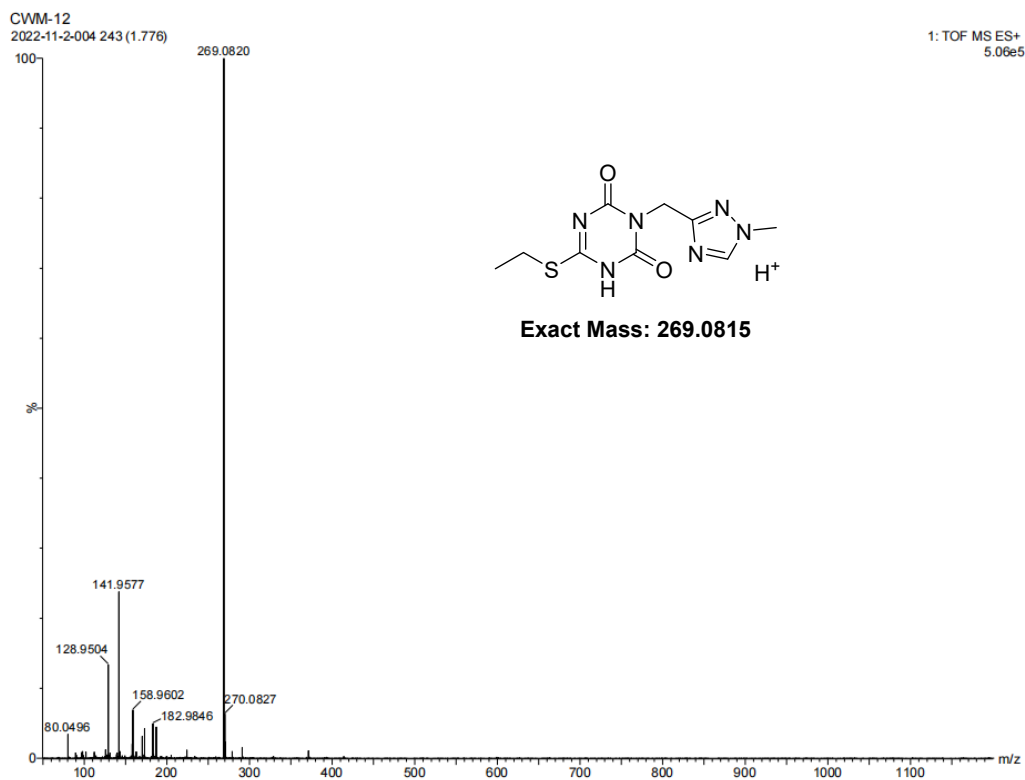

Supplement: d2ra07844a1.pdf [file d2ra07844a1.pdf]
